# Supplementary material
Source: PubMed Central journal article supplement (PMC2844316)
Supplement: supp_123_7_1039__1.pdf [file supp_123_7_1039__1.pdf]

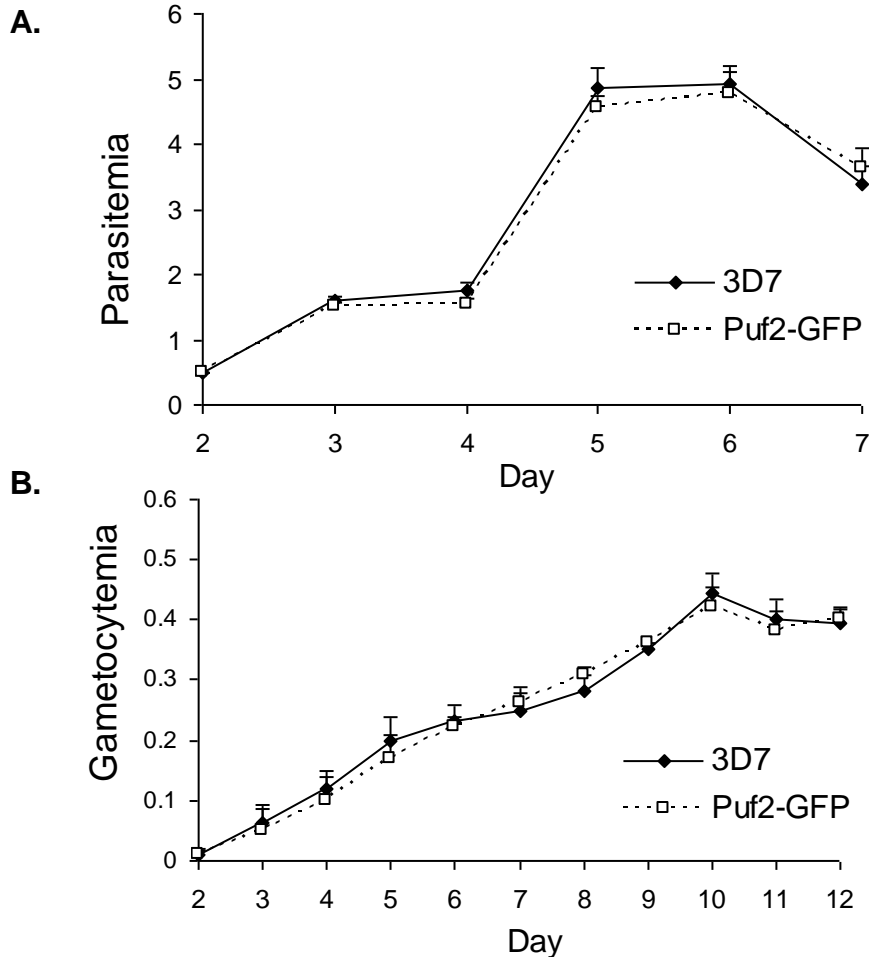

**Figure S1. PfPuf2-GFP parasites show no significant differences in asexual growth (A) and gametocytogenesis (B).** (A) Asexual growth. Synchronized parasite cultures were initiated at 0.5% parasitemia on day 1. Parasitemia was determined daily from Giemsa-stained thin smears. Each point represents the mean and standard deviation from three experiments. (B) Induction of gametocytogenesis. Daily gametocytemias after induction of gametocytogenesis represent the means and standard deviations from three experiments. Statistical analysis by two-way ANOVA followed by Tukey's pairwise comparison showed that daily parasitemias or gametocytemias were not significantly different between the 3D7 and the GFP-tagged line ( $P > 0.05$ ).
