# Supplementary material
Source: PubMed Central journal article supplement (PMC2844316)
Supplement: supp_123_7_1039__2.pdf [file supp_123_7_1039__2.pdf]

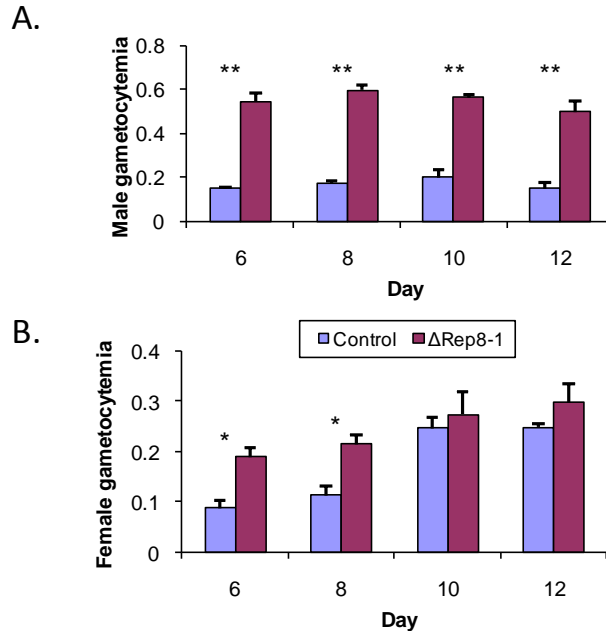

**Figure S2. Male gametocytemias (A) and female gametocytemias (B) in the transfection control and a *PfPuf2* disruptant ( $\Delta$ Rep8-1).** Male and female gametocytes were differentiated by IFA using antibodies against the  $\alpha$ -tubulin II and Pf230. For each time point, \* and \*\* indicate significant difference between the two parasite clones at  $P = 0.05$  and  $0.01$  levels, respectively ( $t$ -test).
