# Supplementary material
Source: PubMed Central journal article supplement (PMC2844316)
Supplement: supp_123_7_1039__3.pdf [file supp_123_7_1039__3.pdf]

**Table S1. Primers used in the experiments.**

| Primers   | 5'→3' sequence (restriction sites underlined) |
|-----------|-----------------------------------------------|
| F2        | CGGGATT <u>CGAGA</u> ATTTACCTGAACAAG          |
| R2        | CTAGT <u>CTAGAT</u> TAATCTTCTTCTGTTATAGCTTC   |
| puf2exF1  | GA <u>AGATCT</u> ATGGACTCCATTTTTTTTAGAAG      |
| puf2exR1  | GACCTAGGTTTTTCCA <u>AATTG</u> TTAATAGCTCT     |
| F2d       | GATCCAGAGAATGACATATT                          |
| Puf2R     | GTTGTCAATAATTTCTGCATC                         |
| DR1       | CGCGGATCCTTAATCTATAACTTGTTCAAGGTGA            |
| PB3A      | TTTGCAAAGACTGCTATGG                           |
| Puf2C     | CCAAATTGTTAATAGCTCTC                          |
| C341F     | CAACTAGCCACTGAATTA <u>AAAAGG</u>              |
| C341R     | CCATATAGTTAAGTGGTTTAGG                        |
| Pfs16F    | GTACTGCTGTCACAAATATG                          |
| Pfs16R    | GAATCATCTAATTCGTCTC                           |
| Pfs27F    | GACACCTATGAATATGTCAAG                         |
| Pfs27R    | GGTTCATCAGGTGTTACGG                           |
| PfPeg3F   | GAAAGGAAATCCTTTGAGAC                          |
| PfPeg3R   | CATAATCCTCAACTAATTCATC                        |
| PF14_744F | GCTGTATCAAATGATTTGGTAG                        |
| PF14_744R | CTTCTTCGTATCATCAGCAA                          |
| α-tubIIF  | CGTTCATTGGTATGTAGGTG                          |
| α-tubIIR  | CATTCATATCCCTCATCTTC                          |
| Pfs47F    | GGAAATAATAAGGAAGGCATG                         |
| Pfs47R    | GTAGATGCGATATGTAATTCC                         |
| BSD F     | TTGTCTCAAGAAGAATCCAC                          |
| BSD R     | TCCCCAGTAAAATGATATAC                          |
| Msp1F     | TACAAGTCCATCATCTCGTT                          |
| Msp1R     | TGGTTAAATCAAAGAGTTCG                          |
